# Supplementary material for: The Gain-of-Function p53 R248W Mutant Promotes Migration by STAT3 Deregulation in Human Pancreatic Cancer Cells
Source: PubMed Central journal article supplement (PMC8226097; doi:10.3389/fonc.2021.642603), 2021-06-11
Supplement: DataSheet_1.pdf [file DataSheet_1.pdf]

| Index | Gene    | Transcript     | Location Pos. | Type               | Nuc Change      | Coverage                             | Chai (H web Ref.                      | c. HGVS                 | p. I mu' m' TVz' M' Weightin Filter Step |
|-------|---------|----------------|---------------|--------------------|-----------------|--------------------------------------|---------------------------------------|-------------------------|------------------------------------------|
| 1     | GNAS    | ENST0000037108 | E1            | -37411 [c C        | G -> A (het)    | 22% (356) [22% (171) / 22% (185)]    | rs74934823 (10                        | c.-37835G>A             | distinct                                 |
| 2     | MAPK4   | ENST0000040038 | E3            | -10553 [c C        | C -> T (homo)   | 100% (705) [100% (442) / 100% (263)] | rs7227230 (100                        | c.547-10553C>T          | distinct                                 |
| 3     | FAT4    | ENST0000039432 | E2            | -4905 [ch C        | T -> C (homo)   | 100% (759) [100% (524) / 100% (235)] | rs925243 (1000                        | c.5176-4905T>C          | distinct                                 |
| 4     | BRD2    | ENST0000044908 | E1            | -3818 [ch C        | G -> A (homo)   | 99% (427) [100% (348) / 96% (79)]    | rs116656352 (1                        | c.-3976G>A              | distinct                                 |
| 5     | BRD2    | ENST0000044908 | E1            | -3813 [ch C        | C -> A (homo)   | 99% (466) [100% (379) / 97% (87)]    | rs115634162 (1                        | c.-3971C>A              | distinct                                 |
| 6     | LMNA    | ENST0000036830 | E2            | -778 [chr: C       | C -> G (homo)   | 100% (291) [99% (159) / 100% (132)]  | rs665979 (1000                        | c.357-778C>G            | distinct                                 |
| 7     | LMNA    | ENST0000036830 | E2            | -739 [chr: C       | T -> G (homo)   | 100% (306) [100% (137) / 100% (169)] | rs513043 (1000                        | c.357-739T>G            | 0/2 of 4<br>distinct                     |
| 8     | BRD2    | ENST0000044908 | E7            | -232 [chr: C       | A -> G (homo)   | 99% (391) [100% (235) / 99% (156)]   | rs3129307 (100                        | c.1060-232A>G           | distinct                                 |
| 9     | BRD2    | ENST0000044908 | E9            | -53..-51 / ΔD      | CTT (homo)      | 93% (589) [95% (333) / 91% (256)]    |                                       | c.1438-53_1438-51delCTT | distinct                                 |
| 10    | KMT2D   | ENST0000030106 | E32           | -46 [chr1: C       | G -> A (het)    | 33% (378) [32% (202) / 33% (176)]    |                                       | c.8047-46G>A            | distinct                                 |
| 11    | LMNA    | ENST0000036830 | E7            | -43 [chr1: C       | A -> G (het)    | 64% (656) [68% (273) / 62% (383)]    | rs16837198 (10                        | c.1158-43A>G            | distinct                                 |
| 12    | SLIT2   | ENST0000050415 | E28           | -42 [chr4: C       | A -> G (het)    | 31% (267) [28% (104) / 33% (163)]    | rs2290750 (100                        | c.2851-42A>G            | distinct                                 |
| 13    | SMARCA4 | ENST0000045071 | E10           | -37..-36 / 2 Indel | TG -> CA (homo) | 92% (898) [94% (421) / 91% (477)]    | rs386806808 (d 762-37_1762-36delinsCA |                         | distinct                                 |
| 14    | MYCBP2  | ENST0000035733 | E42           | -20 [chr1: C       | A -> G (homo)   | 100% (320) [100% (233) / 100% (87)]  | rs3742103 (100                        | c.6001-20A>G            | distinct                                 |
| 15    | SMARCA2 | ENST0000034972 | E9            | -19 [chr9: C       | G -> A (het)    | 36% (199) [33% (103) / 39% (96)]     | rs141618610 (1                        | c.1522-19G>A            | distinct                                 |
| 16    | LRP1B   | ENST0000038948 | E36           | -17 / 1bp I (Dup)  | T (het)         | 51% (207) [54% (168) / 43% (39)]     | rs398104769 (d                        | c.5759-18dupT           | distinct                                 |
| 17    | FGFR2   | ENST0000035848 | E14           | -17 [chr1: C       | T -> G (het)    | 46% (203) [48% (143) / 44% (60)]     | rs3135802 (100                        | c.1864-17T>G            | distinct                                 |
| 18    | LRP1B   | ENST0000038948 | E34           | -17 [chr2: C       | A -> G (homo)   | 100% (545) [100% (323) / 100% (222)] | rs7599219 (dbS                        | c.5501-17A>G            | distinct                                 |
| 19    | TLE4    | ENST0000037655 | E11           | -16 [chr9: C       | C -> T (homo)   | 100% (235) [100% (206) / 100% (29)]  | rs73652238 (10                        | c.784-16C>T             | distinct                                 |
| 20    | MARK2   | ENST0000040201 | E18           | -16 [chr1: C       | C -> T (het)    | 25% (258) [24% (132) / 25% (126)]    |                                       | c.1962-16C>T            | distinct                                 |
| 21    | KMT2C   | ENST0000026218 | E18           | -15 [chr7: C       | T -> C (het)    | 43% (178) [46% (120) / 39% (58)]     | rs62481502 (db                        | c.2872-15T>C            | distinct                                 |
| 22    | SF3B1   | ENST0000033550 | E19           | -15 [chr2: C       | A -> T (homo)   | 100% (209) [100% (169) / 100% (40)]  | rs788017 (1000                        | c.2719-15A>T            | distinct                                 |
| 23    | LRP1B   | ENST0000038948 | E45           | -15 [chr2: C       | C -> G (het)    | 57% (218) [61% (142) / 52% (76)]     | rs11694934 (10                        | c.7388-15C>G            | distinct                                 |
| 24    | ROBO3   | ENST0000039780 | E3            | -14 [chr1: C       | A -> C (het)    | 69% (11) [100% (11) / 0% (0)]        | rs11219820 (10                        | c.488-14A>C             | forced,distinct                          |
| 25    | EGFR    | ENST0000027549 | E1            | -14 [chr7: C       | A -> C (homo)   | 100% (85) [100% (80) / 100% (5)]     | rs712830 (1000                        | c.-191A>C               | forced,distinct                          |
| 26    | BRD2    | ENST0000044908 | E2            | -13 / 1bp I (Dup)  | T (homo)        | 93% (91) [93% (86) / 100% (5)]       |                                       | c.-112-14dupT           | forced,distinct                          |
| 27    | SLIT2   | ENST0000050415 | E12           | -12 [chr4: C       | T -> C (homo)   | 100% (235) [100% (154) / 100% (81)]  | rs519813 (1000                        | c.1059-12T>C            | distinct                                 |
| 28    | SF3B1   | ENST0000033550 | E13           | -11 / 2bp I (Dup)  | TT (homo)       | 86% (166) [86% (129) / 86% (37)]     | rs397804827 (d 1720-13_1720-12dupTT   |                         | distinct                                 |
| 29    | ROBO2   | ENST0000048769 | E2            | -10 [chr3: C       | C -> G (het)    | 79% (1972) [78% (1215) / 80% (757)]  | rs9631539 (dbS                        | c.-13-10C>G             | distinct                                 |
| 30    | BRD2    | ENST0000044908 | E3            | -10 [chr6: C       | T -> C (homo)   | 99% (256) [99% (193) / 100% (63)]    | rs635688 (1000                        | c.193-10T>C             | distinct                                 |
| 31    | MYCBP2  | ENST0000035733 | E13           | -10 / 1bp I (Dup)  | T (het)         | 55% (126) [69% (101) / 30% (25)]     | rs549452634 (d                        | c.1534-11dupT           | distinct                                 |
| 32    | KRAS    | ENST0000025607 | E6            | -9 [chr12: C       | G -> A (het)    | 37% (117) [38% (78) / 34% (39)]      | rs12313763 (10                        | c.*5-9G>A               | distinct                                 |
| 33    | SLIT2   | ENST0000050383 | E9            | -9 [chr4:g C       | G -> T (het)    | 30% (191) [30% (105) / 30% (86)]     | rs7695303 (100                        | c.776-9G>T              | distinct                                 |
| 34    | KMT2D   | ENST0000030106 | E11           | -7 / 1bp [rD       | C (homo)        | 96% (946) [96% (401) / 96% (545)]    | rs112620957 (d                        | c.2798-7delC            | distinct                                 |
| 35    | BRAF    | ENST0000028860 | E1            | -7 [chr7:g C       | A -> C (het)    | 29% (7) [32% (7) / 0% (0)]           |                                       | c.-68A>C                | forced,distinct                          |
| 36    | LRP1B   | ENST0000038948 | E27           | -7 [chr2:g C       | T -> G (het)    | 51% (81) [53% (70) / 44% (11)]       | rs12987572 (10                        | c.4335-7T>G             | distinct                                 |
| 37    | NARF    | ENST0000030979 | E9            | -6 [chr17: C       | T -> G (het)    | 74% (704) [73% (336) / 76% (368)]    | rs12103494 (10                        | c.834-6T>G              | distinct                                 |
| 38    | ROBO1   | ENST0000046423 | E22           | -6 / 1bp [rI (Dup) | T (het)         | 83% (179) [88% (127) / 74% (52)]     | rs369027577 (d                        | c.2883-7dupT            | distinct                                 |
| 39    | APC     | ENST0000025743 | E5            | -4 / 1bp [rD       | A (het)         | 74% (111) [82% (58) / 68% (53)]      | COSM19338 (C                          | c.423-4delA             | distinct                                 |
| 40    | BRD2    | ENST0000044908 | E8            | -4 [chr6:g C       | G -> C (homo)   | 100% (981) [100% (597) / 100% (384)] | rs3097644 (100                        | c.1189-4G>C             | distinct                                 |
| 41    | FAT1    | ENST0000044180 | E3            | -4 [chr4:g C       | G -> C (homo)   | 100% (354) [100% (259) / 100% (95)]  | rs172903 (1000                        | c.3266-4G>C             | distinct                                 |
| 42    | PBRM1   | ENST0000039483 | E11           | -4 [chr3:g C       | G -> A (het)    | 74% (287) [65% (104) / 81% (183)]    | COSM4002750                           | c.996-4G>A              | distinct                                 |
| 43    | LRP1B   | ENST0000038948 | E9            | 3 (1239) [C        | T -> C (het)    | 65% (77) [67% (74) / 38% (3)]        | rs1525579 (100                        | c.1239T>C               | p.Val413=<br>forced,distinct             |
| 44    | LRP1B   | ENST0000038948 | E50           | 5 (8031) [C        | A -> G (het)    | 32% (122) [31% (73) / 33% (49)]      | Q (267) COSM4001201                   | c.8031A>G               | p.Gln2677=<br>distinct                   |
| 45    | CDKN2A  | ENST0000030449 | E2            | 5 (155) [c C       | T -> A (homo)   | 100% (932) [100% (567) / 100% (365)] | > K (52) COSM13436 (C                 | c.155T>A                | p.Met52Lys<br>distinct                   |

|    |          |                |     |             |          |               |             |                           |                            |                  |              |                 |
|----|----------|----------------|-----|-------------|----------|---------------|-------------|---------------------------|----------------------------|------------------|--------------|-----------------|
| 46 | LRP1B    | ENST0000038948 | E54 | 5 (8526)    | [C       | T -> C (het)  | 30% (123)   | [30% (78) / 30% (45)]     | Y (2842 COSM3757652        | c.8526T>C        | p.Tyr2842=   | distinct        |
| 47 | ROBO3    | ENST0000039780 | E21 | 5 (2991)    | [C       | G -> A (homo) | 100% (569)  | [100% (327) / 100% (242)] | · A (997 rs7933204 (100    | c.2991G>A        | p.Ala997=    | distinct        |
| 48 | MYCBP2   | ENST0000035733 | E55 | 8 (7778)    | [C       | A -> G (homo) | 100% (542)  | [100% (316) / 100% (226)] | · S (2592 rs34474844 (10   | c.7778A>G        | p.Asn2593Ser | distinct        |
| 49 | EGFR     | ENST0000027549 | E23 | 8 (2709)    | [C       | T -> C (homo) | 100% (1254) | [100% (646) / 100% (608)] | · T (903 rs1140475 (100    | c.2709T>C        | p.Thr903=    | distinct        |
| 50 | SF3B1    | ENST0000033550 | E5  | 8 (423)     | [c C     | A -> G (homo) | 100% (380)  | [100% (163) / 100% (217)] | · K (141 COSM1129389       | c.423A>G         | p.Lys141=    | distinct        |
| 51 | POLR3A   | ENST0000037237 | E23 | 9 (2997)    | [C       | G -> T (het)  | 55% (377)   | [59% (190) / 52% (187)]   | · V (999 rs12241228 (10    | c.2997G>T        | p.Val999=    | distinct        |
| 52 | JAG1     | ENST0000025495 | E20 | 10 (2382)   | C        | C -> T (het)  | 62% (318)   | [64% (223) / 60% (95)]    | · S (794 rs56225585 (10    | c.2382C>T        | p.Ser794=    | distinct        |
| 53 | FAT4     | ENST0000039432 | E10 | 20 (11814)  | C        | A -> G (het)  | 68% (262)   | [70% (180) / 65% (82)]    | · S (3938 rs17009721 (10   | c.11814A>G       | p.Ser3938=   | distinct        |
| 54 | KMT2C    | ENST0000026218 | E7  | 22 (871)    | [C       | C -> T (het)  | 78% (538)   | [81% (387) / 71% (151)]   | · F (291 rs56850341 (10    | c.871C>T         | p.Leu291Phe  | distinct        |
| 55 | POLR3A   | ENST0000037237 | E16 | 26 (2100)   | C        | C -> T (het)  | 67% (629)   | [67% (346) / 67% (283)]   | · I (700 rs79793998 (10    | c.2100C>T        | p.Ile700=    | distinct        |
| 56 | FAT1     | ENST0000044180 | E11 | 26 (8904)   | C        | C -> T (homo) | 100% (277)  | [100% (226) / 100% (51)]  | · A (296 rs1280099 (100    | c.8904C>T        | p.Ala296=    | distinct        |
| 57 | SLC25A24 | ENST0000056548 | E1  | 27 [chr1:ξ  | C        | T -> G (het)  | 78% (101)   | [78% (100) / 100% (1)]    | ' UTR rs662282 (1000       | c.-194T>G        |              | forced,distinct |
| 58 | U2AF1    | ENST0000029155 | E1  | 29 [chr21 C | C        | A -> C (het)  | 49% (298)   | [48% (166) / 49% (132)]   | ' UTR rs17115876 (10       | c.-65A>C         |              | distinct        |
| 59 | MYCBP2   | ENST0000035733 | E62 | 29 (10440)  | C        | G -> A (homo) | 100% (236)  | [100% (139) / 100% (97)]  | · P (348 rs34700794 (10    | c.10440G>A       | p.Pro3480=   | distinct        |
| 60 | FAT4     | ENST0000039432 | E16 | 30 (12846)  | C        | C -> T (het)  | 71% (280)   | [73% (187) / 67% (93)]    | · S (4282 rs17009819 (10   | c.12846C>T       | p.Ser4282=   | distinct        |
| 61 | ROBO2    | ENST0000048769 | E2  | 32 (19)     | [c C     | C -> A (het)  | 79% (1720)  | [78% (832) / 80% (888)]   | · -S (7) rs12171318 (db    | c.19C>A          | p.Arg7Ser    | distinct        |
| 62 | NARF     | ENST0000030979 | E9  | 34 (867)    | C        | T -> C (het)  | 78% (726)   | [76% (307) / 80% (419)]   | · R (289 rs3829567 (100    | c.867T>C         | p.Arg289=    | distinct        |
| 63 | MYCBP2   | ENST0000035733 | E46 | 37 (6520)   | C        | C -> T (homo) | 100% (329)  | [100% (220) / 100% (109)] | · L (2174 rs34982494 (10   | c.6520C>T        | p.Leu2174=   | distinct        |
| 64 | FGFR2    | ENST0000035848 | E1  | 38 [chr10 C | C        | G -> A (homo) | 100% (275)  | [100% (80) / 100% (195)]  | ' UTR rs1047111 (100       | c.-236G>A        |              | distinct        |
| 65 | SMARCC2  | ENST0000055016 | E5  | 39 (438)    | [C       | A -> G (homo) | 99% (785)   | [99% (318) / 100% (467)]  | · P (146 rs7136420 (100    | c.438A>G         | p.Pro146=    | distinct        |
| 66 | BANF1    | ENST0000031217 | E1  | 39 / 2bp    | [I (Dup) | AG (het)      | 42% (291)   | [41% (165) / 44% (126)]   | ' UTR                      | c.-472_-471dupAG |              | distinct        |
| 67 | PIK3CA   | ENST0000026396 | E12 | 42 (1788)   | C        | A -> G (het)  | 62% (572)   | [65% (322) / 59% (250)]   | · E (596 rs137902538 (1    | c.1788A>G        | p.Glu596=    | distinct        |
| 68 | TLE4     | ENST0000037655 | E18 | 42 (2028)   | C        | A -> C (homo) | 100% (959)  | [100% (447) / 100% (512)] | · A (676 rs34566811 (10    | c.2028A>C        | p.Ala676=    | distinct        |
| 69 | KRAS     | ENST0000025607 | E2  | 46 (35)     | [c C     | G -> A (het)  | 48% (318)   | [48% (150) / 48% (168)]   | · > D (12) rs121913529 (C  | c.35G>A          | p.Gly12Asp   | distinct        |
| 70 | LRP1B    | ENST0000038948 | E32 | 47 (5256)   | C        | A -> G (homo) | 100% (721)  | [100% (412) / 100% (309)] | · S (1752 COSM4133144      | c.5256A>G        | p.Ser1752=   | distinct        |
| 71 | ARID2    | ENST0000033434 | E1  | 52 [chr12 C | C        | G -> A (het)  | 46% (6)     | [50% (6) / 0% (0)]        | ' UTR                      | c.-121G>A        |              | forced,distinct |
| 72 | SLC25A24 | ENST0000037004 | E1  | 53 [chr1:ξ  | C        | A -> T (homo) | 100% (91)   | [100% (91) / 0% (0)]      | ' UTR rs524504 (1000       | c.-145A>T        |              | forced,distinct |
| 73 | ROBO2    | ENST0000048769 | E2  | 55 (42)     | [c C     | A -> G (het)  | 79% (2134)  | [76% (893) / 82% (1241)]  | · > T (14) rs62269817 (db  | c.42A>G          | p.Thr14=     | distinct        |
| 74 | SMARCA4  | ENST0000045071 | E5  | 56 (915)    | [C       | G -> A (het)  | 95% (485)   | [47% (21) / 100% (464)]   | · P (305 rs149573400 (1    | c.915G>A         | p.Pro305=    | distinct        |
| 75 | LRP1B    | ENST0000038948 | E27 | 58 (4392)   | C        | A -> G (het)  | 43% (180)   | [44% (118) / 41% (62)]    | · R (146 rs79054985 (10    | c.4392A>G        | p.Arg1464=   | distinct        |
| 76 | KMT2C    | ENST0000026218 | E15 | 59 (2591)   | C        | A -> G (het)  | 35% (69)    | [41% (56) / 22% (13)]     | · G (864 rs4024420 (dbS    | c.2591A>G        | p.Glu864Gly  | distinct        |
| 77 | POLR3A   | ENST0000037237 | E3  | 60 (240)    | [C       | A -> C (het)  | 74% (330)   | [76% (206) / 71% (124)]   | · > L (80) rs12248310 (10  | c.240A>C         | p.Leu80=     | distinct        |
| 78 | PBRM1    | ENST0000039483 | E23 | 64 (3522)   | C        | A -> T (homo) | 100% (904)  | [100% (389) / 100% (515)] | · P (117 rs1074002747      | c.3522A>T        | p.Pro1174=   | distinct        |
| 79 | BRD2     | ENST0000044908 | E2  | 64 [chr6:ξ  | C        | G -> A (homo) | 100% (405)  | [100% (286) / 100% (119)] | ' UTR rs516535 (1000       | c.-49G>A         |              | distinct        |
| 80 | LRP1B    | ENST0000038948 | E30 | 67 (5006)   | C        | A -> C (het)  | 65% (639)   | [67% (399) / 63% (240)]   | · A (1669)                 | c.5006A>C        | p.Glu1669Ala | distinct        |
| 81 | SLIT2    | ENST0000050415 | E21 | 68 (2211)   | C        | C -> T (het)  | 28% (204)   | [28% (107) / 28% (97)]    | · V (737 rs7690492 (100    | c.2211C>T        | p.Val737=    | distinct        |
| 82 | APC      | ENST0000025743 | E14 | 69 (1695)   | C        | A -> G (homo) | 100% (241)  | [100% (102) / 99% (139)]  | · E (565 rs77921116 (10    | c.1695A>G        | p.Glu565=    | distinct        |
| 83 | LRP1B    | ENST0000038948 | E8  | 69 (1082)   | C        | G -> A (het)  | 36% (279)   | [35% (131) / 36% (148)]   | · Q (361 COSM1007086       | c.1082G>A        | p.Arg361Gln  | distinct        |
| 84 | SLC25A24 | ENST0000056548 | E1  | 70..76 / 7b | D        | CCTGCGC (het) | 65% (112)   | [65% (110) / 50% (2)]     | ' UTR rs150513527 (1..151_ | c.-145delCCTGCGC |              | forced,distinct |
| 85 | FAT1     | ENST0000044180 | E23 | 74 (12177)  | C        | G -> C (homo) | 100% (641)  | [100% (300) / 100% (341)] | · N (405 rs1280097 (100    | c.12177G>C       | p.Lys405Asn  | distinct        |
| 86 | RBM6     | ENST0000026602 | E21 | 75 (3321)   | C        | C -> T (homo) | 100% (371)  | [100% (112) / 100% (259)] | · Y (1107 COSM4158172      | c.3321C>T        | p.Tyr1107=   | distinct        |
| 87 | CHD1     | ENST0000028404 | E26 | 77 (3648)   | C        | C -> T (homo) | 100% (670)  | [100% (350) / 100% (320)] | · S (121 rs140751250 (1    | c.3648C>T        | p.Ser1216=   | distinct        |
| 88 | EGFR     | ENST0000027549 | E20 | 78 (2361)   | C        | G -> A (homo) | 99% (821)   | [98% (427) / 99% (394)]   | · Q (787 COSM1451600       | c.2361G>A        | p.Gln787=    | distinct        |
| 89 | LRP1B    | ENST0000038948 | E85 | 80 (13047)  | C        | G -> A (het)  | 22% (220)   | [24% (108) / 21% (112)]   | · T (434 rs1386356 (100    | c.13047G>A       | p.Thr4349=   | distinct        |
| 90 | GNAS     | ENST0000037108 | E5  | 81 (393)    | [C       | C -> T (het)  | 81% (740)   | [82% (276) / 81% (464)]   | · I (131) COSM3758661      | c.393C>T         | p.Ile131=    | distinct        |

|     |          |                     |                   |                  |                                       |                         |                  |                 |                 |
|-----|----------|---------------------|-------------------|------------------|---------------------------------------|-------------------------|------------------|-----------------|-----------------|
| 91  | SLC25A24 | ENST0000056548: E4  | 82 (480) [C       | G -> A (het)     | 28% (139) [25% (62) / 31% (77)]       | • E (160 rs11185293 (10 | c.480G>A         | p.Glu160=       | distinct        |
| 92  | PIK3CA   | ENST0000026396: E6  | 84 (1143) C       | C -> G (het)     | 63% (491) [61% (178) / 64% (313)]     | • P (381 rs72561481 (10 | c.1143C>G        | p.Pro381=       | distinct        |
| 93  | ROBO2    | ENST0000048769: E2  | 86..88 (73. Indel | GTG -> ATC (het) | 34% (891) [32% (326) / 36% (565)]     | • I (25)                | c.73_75delinsATC | p.Val25lle      | distinct        |
| 94  | KMT2C    | ENST0000026218: E18 | 87 (2958) C       | A -> G (het)     | 51% (269) [53% (123) / 50% (146)]     | • P (986 rs28439884 (db | c.2958A>G        | p.Pro986=       | distinct        |
| 95  | CHD1     | ENST0000028404: E31 | 87 (4335) C       | G -> A (homo)    | 100% (305) [100% (112) / 100% (193)]  | E (1445 COSM4003637     | c.4335G>A        | p.Glu1445=      | distinct        |
| 96  | ROBO2    | ENST0000048769: E2  | 88 (75) [c C      | G -> C (het)     | 39% (977) [36% (347) / 42% (630)]     | > V (25) rs62269818 (db | c.75G>C          | p.Val25=        | distinct        |
| 97  | LRP1B    | ENST0000038948: E51 | 89 (8238) C       | G -> A (het)     | 65% (284) [65% (127) / 65% (157)]     | G (274 rs61732738 (10   | c.8238G>A        | p.Gly2746=      | distinct        |
| 98  | SLC25A24 | ENST0000056548: E1  | 89 [chr1:ξ C      | A -> C (het)     | 75% (115) [76% (113) / 50% (2)]       | ' UTR rs554709 (1000    | c.-132A>C        |                 | forced,distinct |
| 99  | KMT2C    | ENST0000026218: E18 | 92 (2963) C       | G -> T (het)     | 55% (256) [56% (112) / 54% (144)]     | • F (988 rs28522267 (db | c.2963G>T        | p.Cys988Phe     | distinct        |
| 100 | BRD2     | ENST0000044908: E8  | 92 (1280) C       | C -> T (homo)    | 100% (807) [100% (418) / 100% (389)]  | • V (427 rs3918143 (100 | c.1280C>T        | p.Ala427Val     | distinct        |
| 101 | SLC25A24 | ENST0000056548: E2  | 93 (276) [C       | A -> G (het)     | 71% (195) [70% (85) / 73% (110)]      | > K (92) COSM3750202    | c.276A>G         | p.Lys92=        | distinct        |
| 102 | BRD4     | ENST0000026337: E11 | 95 (2142) C       | C -> T (homo)    | 100% (968) [100% (444) / 100% (524)]  | • S (714 rs114723577 (1 | c.2142C>T        | p.Ser714=       | distinct        |
| 103 | KMT2C    | ENST0000026218: E7  | 97 (946) [C       | A -> T (het)     | 83% (821) [83% (469) / 82% (352)]     | • S (316 rs10454320 (db | c.946A>T         | p.Thr316Ser     | distinct        |
| 104 | ATM      | ENST0000027861: E23 | 99 (3383) C       | A -> G (homo)    | 100% (523) [99% (136) / 100% (387)]   | R (1125 COSM1350830     | c.3383A>G        | p.Gln1128Arg    | distinct        |
| 105 | FAT1     | ENST0000044180: E26 | 101 (1310) C      | T -> C (homo)    | 100% (840) [100% (404) / 100% (436)]  | S (4367 COSM4158952     | c.13101T>C       | p.Ser4367=      | distinct        |
| 106 | SMARCA4  | ENST0000045071: E8  | 105 (1524) C      | T -> C (homo)    | 100% (955) [100% (480) / 100% (475)]  | • H (508 COSM4131184    | c.1524T>C        | p.F [c.1524T>C] | distinct        |
| 107 | SMAD4    | ENST0000034298: E9  | 112 (1067) C      | C -> T (homo)    | 100% (733) [100% (368) / 100% (365)]  | • L (356 COSM14049 (C   | c.1067C>T        | p.Pro356Leu     | distinct        |
| 108 | FAT1     | ENST0000044180: E19 | 112 (1066) C      | T -> G (homo)    | 100% (779) [100% (403) / 100% (376)]  | A (3554 rs2637777 (100  | c.10660T>G       | p.Ser3554Ala    | distinct        |
| 109 | LRP1B    | ENST0000038948: E16 | 113 (2616) C      | C -> T (homo)    | 100% (160) [100% (76) / 100% (84)]    | • D (872 rs13007735 (10 | c.2616C>T        | p.Asp872=       | distinct        |
| 110 | FGFR2    | ENST0000035848: E1  | 117 [chr1 C       | A -> G (het)     | 44% (65) [44% (23) / 44% (42)]        | ' UTR rs41258305 (10    | c.-157A>G        |                 | distinct        |
| 111 | EGFR     | ENST0000027549: E15 | 117 (1839) C      | C -> T (homo)    | 100% (676) [100% (311) / 100% (365)]  | • A (613 rs17290169 (10 | c.1839C>T        | p.Ala613=       | distinct        |
| 112 | TLE4     | ENST0000037655: E15 | 118 (1458) C      | C -> T (homo)    | 98% (1502) [98% (751) / 98% (751)]    | • H (486 rs61742686 (10 | c.1458C>T        | p.His486=       | distinct        |
| 113 | SF3B1    | ENST0000033550: E24 | 118 (3657) C      | A -> G (homo)    | 100% (721) [100% (271) / 100% (450)]  | V (1215 COSM3757859     | c.3657A>G        | p.Val1219=      | distinct        |
| 114 | SLIT2    | ENST0000050415: E1  | 120 [chr4 C       | G -> T (het)     | 26% (10) [26% (10) / 0% (0)]          | ' UTR rs7655084 (100    | c.-133G>T        |                 | forced,distinct |
| 115 | TP53BP2  | ENST0000034353: E6  | 121 (595) C       | G -> A (het)     | 60% (380) [58% (165) / 61% (215)]     | M (199 rs146703239 (1   | c.595G>A         | p.Val199Met     | distinct        |
| 116 | FAT1     | ENST0000044180: E13 | 122 (9351) C      | T -> C (homo)    | 100% (1066) [100% (477) / 100% (589)] | D (3115 COSM4003024     | c.9351T>C        | p.Asp3117=      | distinct        |
| 117 | SMARCC2  | ENST0000055016: E25 | 134 (2682) C      | C -> T (homo)    | 100% (291) [100% (101) / 100% (190)]  | • A (894 rs17852368 (10 | c.2682C>T        | p.Ala894=       | distinct        |
| 118 | FAT1     | ENST0000044180: E13 | 134 (9363) C      | C -> T (homo)    | 100% (1039) [100% (413) / 100% (626)] | N (312 rs2249916 (100   | c.9363C>T        | p.Asn3121=      | distinct        |
| 119 | SF3B1    | ENST0000033550: E18 | 135 (2631) C      | T -> C (homo)    | 100% (412) [100% (128) / 100% (284)]  | • G (877 COSM3757860    | c.2631T>C        | p.Gly877=       | distinct        |
| 120 | BRD7     | ENST0000039468: E7  | 144 (846) C       | C -> T (het)     | 50% (356) [51% (163) / 50% (193)]     | • A (282 COSM3720984    | c.846C>T         | p.Ala282=       | distinct        |
| 121 | U2AF2    | ENST0000045055: E11 | 159 (1191) C      | C -> T (homo)    | 99% (507) [99% (193) / 99% (314)]     | • D (397 COSM1396639    | c.1191C>T        | p.Asp397=       | distinct        |
| 122 | TP53     | ENST0000026930: E4  | 171 (267) / D     | C (homo)         | 95% (635) [91% (272) / 98% (363)]     | • 122 R COSM1180853     | c.267delC        | p.Ser90Profs*33 | distinct        |
| 123 | FAT1     | ENST0000044180: E5  | 176 (3818) C      | A -> G (homo)    | 100% (991) [100% (478) / 100% (513)]  | R (1275 rs328418 (1000  | c.3818A>G        | p.His1273Arg    | distinct        |
| 124 | FAT4     | ENST0000039432: E4  | 191 (5760) C      | T -> C (homo)    | 100% (627) [100% (295) / 100% (332)]  | D (192 COSM1131273      | c.5760T>C        | p.Asp1920=      | distinct        |
| 125 | FGFR1    | ENST0000044771: E1  | 192 [chr8 C       | C -> T (homo)    | 100% (13) [100% (10) / 100% (3)]      | ' UTR rs2445003 (100    | c.-751C>T        |                 | distinct        |
| 126 | FGFR2    | ENST0000036905: E17 | 196 [chr1 C       | A -> G (homo)    | 85% (23) [0% (0) / 85% (23)]          | ' UTR rs1649167 (100    | c.*190A>G        |                 | forced,distinct |
| 127 | LRP1B    | ENST0000038948: E41 | 206 (6633) C      | A -> T (het)     | 32% (220) [37% (102) / 29% (118)]     | P (2211 rs13431727 (10  | c.6633A>T        | p.Pro2211=      | distinct        |
| 128 | FAT1     | ENST0000044180: E19 | 209 (1075) C      | T -> C (het)     | 63% (545) [63% (259) / 63% (286)]     | • T (358 rs115705222 (1 | c.10757T>C       | p.Met3586Thr    | distinct        |
| 129 | BRD3     | ENST0000030340: E6  | 222 (936) C       | A -> G (homo)    | 100% (933) [100% (440) / 100% (493)]  | • L (312 COSM4163507    | c.936A>G         | p.Leu312=       | distinct        |
| 130 | TGFBP2   | ENST0000029575: E1  | 255 [chr3 C       | C -> G (het)     | 76% (212) [76% (192) / 83% (20)]      | ' UTR rs2306856 (100    | c.-128C>G        |                 | distinct        |
| 131 | FAT4     | ENST0000039432: E9  | 257 (7701) C      | G -> C (homo)    | 100% (817) [100% (399) / 100% (418)]  | V (2567 rs988863 (1000  | c.7701G>C        | p.Val2567=      | distinct        |
| 132 | BANF1    | ENST0000031217: E1  | 260 [chr1 C       | G -> C (het)     | 50% (449) [51% (255) / 49% (194)]     | ' UTR rs1786171 (100    | c.-249G>C        |                 | distinct        |
| 133 | BANF1    | ENST0000031217: E3  | 275 [chr1 C       | C -> A (het)     | 52% (123) [54% (19) / 52% (104)]      | ' UTR rs144367403 (1    | c.*128C>A        |                 | distinct        |
| 134 | PBRM1    | ENST0000039483: E17 | 287 (2211) C      | A -> G (homo)    | 100% (879) [100% (457) / 100% (422)]  | • T (737 COSM1566683    | c.2211A>G        | p.Thr737=       | distinct        |

|     |        |                |      |      |               |               |             |                           |                |                                 |                 |                          |
|-----|--------|----------------|------|------|---------------|---------------|-------------|---------------------------|----------------|---------------------------------|-----------------|--------------------------|
| 135 | SLIT2  | ENST0000050415 | E37  | 293  | [chr4 C       | G -> A (homo) | 100% (809)  | [100% (303) / 100% (506)] | ' UTR          | rs1379659 (100                  | c.*51G>A        | distinct                 |
| 136 | FGFR1  | ENST0000044771 | E1   | 307  | [chr8 C       | C -> T (het)  | 33% (10)    | [35% (8) / 29% (2)]       | ' UTR          | rs3213849 (100                  | c.-636C>T       | forced,distinct          |
| 137 | LMNA   | ENST0000036830 | E12  | 392  | [chr1 C       | C -> T (het)  | 75% (6)     | [67% (2) / 80% (4)]       | ' UTR          | rs74116489 (10                  | c.*365C>T       | distinct                 |
| 138 | SETD2  | ENST0000040979 | E3   | 470  | (557) C       | C -> T (homo) | 100% (590)  | [100% (268) / 100% (322)] | > L (186       | rs78759480 (10                  | c.557C>T        | p.Pro186Leu<br>distinct  |
| 139 | ACVR2A | ENST0000024141 | E1   | 472  | / 1bp I (Dup) | T (het)       | 33% (4)     | [33% (4) / 0% (0)]        | ' UTR          |                                 | c.-166dupT      | forced,distinct          |
| 140 | BRD2   | ENST0000037482 | E2   | 523  | [chr6 C       | G -> T (homo) | 100% (312)  | [100% (57) / 100% (255)]  | ' UTR          | rs974357 (1000                  | c.-782G>T       | distinct                 |
| 141 | MARK2  | ENST0000040201 | (E19 | 548  | [chr1 C       | A -> C (het)  | 47% (28)    | [0% (0) / 47% (28)]       | ' UTR          | rs182664 (1000                  | c.*187A>C       | forced,distinct          |
| 142 | RNF43  | ENST0000040797 | E9   | 633  | (1585) C      | C -> T (het)  | 75% (1042)  | [76% (639) / 74% (403)]   | W (529         | COSM191575 (C                   | c.1585C>T       | p.Arg529Trp<br>distinct  |
| 143 | MYC    | ENST0000037797 | E2   | 708  | (738) C       | G -> A (het)  | 55% (945)   | [50% (303) / 58% (642)]   | > P (246       | rs2070582 (100                  | c.738G>A        | p.Pro246=<br>distinct    |
| 144 | MYC    | ENST0000037797 | E2   | 708  | (738) C       | G -> A (het)  | 55% (945)   | [50% (303) / 58% (642)]   | > P (246       | rs2070582 (100                  | c.738G>A        | p.Pro246=<br>distinct    |
| 145 | FAT1   | ENST0000044180 | E27  | 883  | [chr4 C       | G -> A (het)  | 30% (9)     | [0% (0) / 30% (9)]        | ' UTR          | rs7680937 (100                  | c.*254G>A       | forced,distinct          |
| 146 | LRP1B  | ENST0000038948 | E1   | 895  | [chr2 C       | C -> G (homo) | 99% (705)   | [99% (453) / 99% (252)]   | ' UTR          | rs1375610 (100                  | c.-78C>G        | distinct                 |
| 147 | KMT2D  | ENST0000030106 | E10  | 1025 | .105: D       | ATCTCCGCAGGCT | 74% (366)   | [55% (98) / 85% (268)]    | IL -> L (7     | rs375538882 (dIATCTCCGCAGGCTGAC | p.Ala765_Gln77: | distinct                 |
| 148 | KMT2D  | ENST0000030106 | E10  | 1025 | .105: D       | ATCTCCGCAGGCT | 74% (366)   | [55% (98) / 85% (268)]    | IL -> L (7     | rs375538882 (dIATCTCCGCAGGCTGAC | p.Ala765_Gln77: | distinct                 |
| 149 | TLE4   | ENST0000037655 | E1   | 1063 | (45) C        | A -> G (homo) | 100% (751)  | [100% (291) / 100% (460)] | > P (15)       | COSM4164047                     | c.45A>G         | p.Pro15=<br>distinct     |
| 150 | FAT1   | ENST0000044180 | E2   | 1230 | (121: C       | T -> G (het)  | 28% (257)   | [30% (160) / 26% (97)]    | > R (404       | COSM4003044                     | c.1212T>G       | p.Ser404Arg<br>distinct  |
| 151 | FAT4   | ENST0000039432 | E1   | 1371 | (135: C       | A -> T (homo) | 100% (1316) | [100% (665) / 100% (651)] | > L (453       | COSM3760369                     | c.1358A>T       | p.Gln453Leu<br>distinct  |
| 152 | FAT4   | ENST0000039432 | E9   | 1392 | (883: C       | A -> G (het)  | 59% (484)   | [59% (245) / 59% (239)]   | V (2946        | rs76048257 (10                  | c.8836A>G       | p.Ile2946Val<br>distinct |
| 153 | FAT1   | ENST0000044180 | E2   | 1462 | (144: C       | G -> A (het)  | 29% (308)   | [27% (134) / 31% (174)]   | > I (482       | rs3733413 (100                  | c.1444G>A       | p.Val482Ile<br>distinct  |
| 154 | FAT1   | ENST0000044180 | E2   | 1503 | (148: C       | C -> T (het)  | 28% (334)   | [27% (174) / 30% (160)]   | > N (495       | COSM4003040                     | c.1485C>T       | p.Asn495=<br>distinct    |
| 155 | FAT4   | ENST0000039432 | E17  | 1520 | (145: C       | A -> G (het)  | 64% (560)   | [67% (271) / 61% (289)]   | R (486         | rs1014866 (100                  | c.14598A>G      | p.Arg486=<br>distinct    |
| 156 | APC    | ENST0000025743 | E16  | 1774 | (373: C       | A -> G (homo) | 100% (578)  | [100% (242) / 100% (336)] | Q (124         | rs74380081 (10                  | c.3732A>G       | p.Gln1244=<br>distinct   |
| 157 | FAT4   | ENST0000039432 | E17  | 1836 | (149: C       | C -> T (het)  | 36% (193)   | [40% (65) / 34% (128)]    | S (4972        | COSM4002932                     | c.14914C>T      | p.Pro4972Ser<br>distinct |
| 158 | FAT1   | ENST0000044180 | E2   | 1860 | (184: C       | C -> G (het)  | 30% (216)   | [30% (108) / 30% (108)]   | > L (614       | COSM4003038                     | c.1842C>G       | p.Phe614Leu<br>distinct  |
| 159 | FAT4   | ENST0000039432 | E9   | 2426 | (987: C       | G -> A (het)  | 63% (385)   | [61% (169) / 65% (216)]   | G (329         | rs115219562 (1                  | c.9870G>A       | p.Gly3290=<br>distinct   |
| 160 | FAT4   | ENST0000039432 | E1   | 2433 | (242: C       | C -> T (homo) | 100% (968)  | [100% (592) / 100% (376)] | > V (807       | COSM3760371                     | c.2420C>T       | p.Ala807Val<br>distinct  |
| 161 | FAT1   | ENST0000044180 | E2   | 2602 | (258: C       | G -> G (het)  | 33% (376)   | [33% (212) / 33% (164)]   | > L (862       | COSM4003037                     | c.2584G>C       | p.Val862Leu<br>distinct  |
| 162 | SETD2  | ENST0000040979 | E3   | 2617 | (270: C       | G -> C (homo) | 100% (961)  | [100% (526) / 100% (435)] | > Q (902       | rs58906143 (10                  | c.2704G>C       | p.Glu902Gln<br>distinct  |
| 163 | FAT4   | ENST0000039432 | E1   | 2824 | (281: C       | G -> T (het)  | 26% (284)   | [26% (136) / 26% (148)]   | > N (937       | rs112454576 (1                  | c.2811G>T       | p.Lys937Asn<br>distinct  |
| 164 | FAT4   | ENST0000039432 | E1   | 2957 | (294: C       | T -> C (homo) | 100% (667)  | [100% (345) / 100% (322)] | > L (982       | rs2940779 (100                  | c.2944T>C       | p.Leu982=<br>distinct    |
| 165 | FAT1   | ENST0000044180 | E2   | 3208 | (319: C       | A -> G (homo) | 100% (959)  | [100% (479) / 100% (480)] | G (106         | COSM4003035                     | c.3190A>G       | p.Arg1064Gly<br>distinct |
| 166 | FAT1   | ENST0000044180 | E10  | 3988 | (879: C       | A -> T (het)  | 71% (575)   | [70% (256) / 73% (319)]   | L (293         | rs1280098 (100                  | c.8798A>T       | p.Gln2933Leu<br>distinct |
| 167 | FAT1   | ENST0000044180 | E10  | 3988 | (879: C       | A -> C (het)  | 29% (231)   | [30% (111) / 27% (120)]   | P (293         | COSM4005727                     | c.8798A>C       | p.Gln2933Pro<br>distinct |
| 168 | FAT4   | ENST0000039432 | E9   | 4038 | (114: C       | A -> G (het)  | 64% (611)   | [63% (290) / 65% (321)]   | E (382         | rs17009684 (10                  | c.11482A>G      | p.Lys3828Glu<br>distinct |
| 169 | FAT4   | ENST0000039432 | E9   | 4174 | (116: C       | G -> A (homo) | 100% (916)  | [100% (454) / 100% (462)] | N (387         | rs12650153 (10                  | c.11618G>A      | p.Ser3873Asn<br>distinct |
| 170 | FAT4   | ENST0000039432 | E1   | 4318 | (430: C       | C -> T (homo) | 100% (1097) | [100% (536) / 100% (561)] | I (1435        | rs2710555 (100                  | c.4305C>T       | p.Ile1435=<br>distinct   |
| 171 | LRP1B  | ENST0000038948 | E55  | +3   | [chr2:ξ C     | A -> G (het)  | 24% (72)    | [27% (20) / 23% (52)]     | rs117225004 (1 |                                 | c.8850+3A>G     | distinct                 |
| 172 | ROBO1  | ENST0000046423 | E26  | +4   | [chr3:ξ C     | T -> C (homo) | 100% (679)  | [100% (303) / 100% (376)] | rs7636043 (100 |                                 | c.3875+4T>C     | distinct                 |
| 173 | LRP1B  | ENST0000038948 | E33  | +5   | [chr2:ξ C     | A -> G (homo) | 100% (380)  | [100% (144) / 100% (236)] | rs996361 (1000 |                                 | c.5500+5A>G     | distinct                 |
| 174 | PBRM1  | ENST0000039483 | E29  | +6   | / 3bp I       | GAG (homo)    | 88% (469)   | [91% (166) / 87% (303)]   | rs71084187 (db | 4576+5_4576+6insGAG             |                 | distinct                 |
| 175 | SF1    | ENST0000037739 | E6   | +6   | [chr11 C      | C -> T (het)  | 48% (736)   | [52% (424) / 42% (312)]   | rs148875917 (1 |                                 | c.663+6C>T      | distinct                 |
| 176 | GATA6  | ENST0000026921 | E6   | +7   | [chr18 C      | A -> G (homo) | 100% (219)  | [100% (53) / 100% (166)]  | COSM4000377    |                                 | c.1620+7A>G     | distinct                 |
| 177 | LRP1B  | ENST0000038948 | E19  | +10  | [chr2 C       | A -> C (homo) | 100% (217)  | [100% (78) / 100% (139)]  | rs1429348 (100 |                                 | c.2968+10A>C    | distinct                 |
| 178 | LRP1B  | ENST0000038948 | E49  | +12  | [chr2 C       | A -> T (het)  | 63% (347)   | [62% (101) / 64% (246)]   | rs13404083 (10 |                                 | c.8026+12A>T    | distinct                 |

|     |         |                    |                    |               |                                       |                                    |                            |                    |                 |
|-----|---------|--------------------|--------------------|---------------|---------------------------------------|------------------------------------|----------------------------|--------------------|-----------------|
| 179 | LMNA    | ENST0000036830(E4  | +13 [chr1 C        | G -> T (het)  | 61% (576) [57% (227) / 64% (349)]     | rs11264444 (10                     | c.810+13G>T                |                    | distinct        |
| 180 | LRP1B   | ENST0000038948(E30 | +14 / 1bp I        | A (het)       | 87% (451) [79% (152) / 92% (299)]     | rs78477398 (10.5114+13_5114+14insA |                            |                    | distinct        |
| 181 | LRP1B   | ENST0000038948(E34 | +15 [chr2 C        | A -> G (het)  | 71% (411) [72% (155) / 70% (256)]     | rs13382825 (10                     | c.5626+15A>G               |                    | distinct        |
| 182 | MYCBP2  | ENST0000035733(E42 | +15 / 1bp D        | T (homo)      | 95% (242) [100% (33) / 95% (209)]     | rs397840781 (d                     | c.6226+15delT              |                    | distinct        |
| 183 | KMT2C   | ENST0000026218(E7  | +15 [chr7 C        | G -> C (het)  | 24% (198) [23% (59) / 24% (139)]      | rs201635031 (d                     | c.1012+15G>C               |                    | distinct        |
| 184 | CHD1    | ENST0000028404(E13 | +16 [chr5 C        | A -> G (homo) | 100% (337) [100% (93) / 100% (244)]   | rs17166428 (10                     | c.1991+16A>G               |                    | distinct        |
| 185 | SLIT2   | ENST0000050415(E28 | +16 [chr4 C        | A -> G (het)  | 23% (102) [25% (41) / 22% (61)]       | rs12506323 (10                     | c.2948+16A>G               |                    | distinct        |
| 186 | MARK2   | ENST0000040201(E11 | +16 [chr1 C        | C -> T (het)  | 51% (405) [50% (114) / 51% (291)]     | rs224174 (1000                     | c.1101+16C>T               |                    | distinct        |
| 187 | SMARCA4 | ENST0000045071(E31 | +16 [chr1 C        | G -> T (homo) | 100% (565) [100% (282) / 100% (283)]  | rs151265814 (1                     | c.4675+16G>T               |                    | distinct        |
| 188 | NARF    | ENST0000030979(E3  | +17 [chr1 C        | A -> T (het)  | 74% (577) [73% (149) / 74% (428)]     | rs28401416 (10                     | c.252+17A>T                |                    | distinct        |
| 189 | ROBO3   | ENST0000039780(E4  | +24 [chr1 C        | T -> C (homo) | 100% (793) [100% (417) / 100% (376)]  | rs4936957 (100                     | c.766+24T>C                |                    | distinct        |
| 190 | SF1     | ENST0000037739(E6  | +32 [chr1 C        | A -> G (homo) | 100% (1454) [100% (607) / 100% (847)] | rs484886 (1000                     | c.663+32A>G                |                    | distinct        |
| 191 | POLR3A  | ENST0000037237(E22 | +42 [chr1 C        | T -> C (het)  | 59% (449) [58% (226) / 60% (223)]     | rs3815891 (100                     | c.2988+42T>C               |                    | distinct        |
| 192 | BRD2    | ENST0000044908(E9  | +663 / 4bp I (Dup) | GTTT (het)    | 56% (76) [79% (55) / 32% (21)]        |                                    | c.1700+659_1700+662dupGTTT |                    | distinct        |
| 193 | BRD2    | ENST0000044908(E9  | +672 [chr C        | A -> T (het)  | 84% (97) [85% (52) / 82% (45)]        | rs2395380 (100                     | c.1700+672A>T              |                    | distinct        |
| 194 | BRD2    | ENST0000044908(E9  | +689 [chr C        | G -> T (homo) | 95% (109) [91% (52) / 98% (57)]       | rs2082260 (100                     | c.1700+689G>T              |                    | distinct        |
| 195 | BRD2    | ENST0000044908(E9  | +698 / 1bp I (Dup) | T (het)       | 40% (47) [40% (20) / 40% (27)]        |                                    | c.1700+697dupT             |                    | distinct        |
| 196 | SLIT2   | ENST0000050415(E1  | +1105 [chr C       | G -> A (het)  | 28% (334) [29% (137) / 27% (197)]     | rs1323066 (100                     | c.179+1105G>A              |                    | distinct        |
| 197 | SMAD4   | ENST0000034298(E4  | +2088 [chr C       | G -> C (homo) | 100% (89) [100% (42) / 100% (47)]     | rs7229678 (100                     | c.454+2088G>C              | 2/1 of 3           | distinct        |
| 198 | SMAD3   | ENST0000032736(E1  | +32698 / 1D        | T (homo)      | 98% (1802) [98% (797) / 97% (1005)]   |                                    | c.206+32698delT            |                    | distinct        |
| 199 | ATM     | ENST0000027861(E1  | 275 [chr1 C        | G -> A (homo) | 100% (280) [100% (140) / 100% (140)]  | ' UTR rs189037 (1000               | c.-111G>A                  | 1/0 DP             | distinct        |
| 200 | BRCA1   | ENST0000035765(E10 | 1942 (261) C       | C -> T (homo) | 100% (1429) [100% (679) / 100% (750)] | > L (871) COSM148278 (C            | c.2612C>T                  | p.F 32/ DP, POLY   | distinct        |
| 201 | ASCC3   | ENST0000036916(E12 | 33 (1935) C        | C -> T (homo) | 100% (525) [100% (343) / 99% (182)]   | > L (645) rs41288423 (10           | c.1935C>T                  | p.L 88/ Ident-SNI  | distinct        |
| 202 | MMACHC  | ENST0000040106(E3  | 45 (321) [C        | G -> A (het)  | 29% (242) [28% (107) / 31% (135)]     | > V (107) rs2275276 (100           | c.321G>A                   | p.V 77/ Ident-SNI  | distinct        |
| 203 | TPH2    | ENST0000033385(E9  | 57 (1125) C        | A -> T (homo) | 100% (895) [100% (523) / 100% (372)]  | > A (375) COSM3753489              | c.1125A>T                  | p.A 162 Ident-SNI  | distinct        |
| 204 | EDNRB   | ENST0000044657(E4  | 30 (831) [C        | A -> G (homo) | 100% (499) [100% (286) / 100% (213)]  | > L (277) COSM3753750              | c.831A>G                   | p.L 156 Ident-SNI  | distinct        |
| 205 | GABRG3  | ENST0000033374(E8  | 98 (963) [C        | C -> T (het)  | 37% (629) [37% (366) / 36% (263)]     | > T (321) rs140679 (1000           | c.963C>T                   | p.T 100 Ident-SNI  | distinct        |
| 206 | GABRG3  | ENST0000033374(E8  | 98 (963) [C        | C -> T (het)  | 37% (629) [37% (366) / 36% (263)]     | > T (321) rs140679 (1000           | c.963C>T                   | p.T 100 Ident-SNI  | distinct        |
| 207 | ATP13A4 | ENST0000039244(E6  | 10 (543) [C        | A -> G (het)  | 29% (249) [30% (163) / 28% (86)]      | M (181) COSM3759936                | c.543A>G                   | p.II 55/ Ident-SNI | distinct        |
| 208 | WDFY3   | ENST0000032236(E6  | 32 (336) [C        | A -> G (het)  | 66% (523) [67% (280) / 65% (243)]     | > L (112) COSM4003176              | c.336A>G                   | p.L 56/ Ident-SNI  | distinct        |
| 209 | MUT     | ENST0000027481(E3  | 251 (636) C        | G -> A (homo) | 100% (435) [100% (226) / 99% (209)]   | > K (212) rs2229384 (100           | c.636G>A                   | p.L 151 Ident-SNI  | distinct        |
| 210 | MPDZ    | ENST0000031921(E25 | 157 (3609) C       | A -> G (het)  | 29% (168) [31% (69) / 27% (99)]       | K (120) rs10756457 (10             | c.3609A>G                  | p.L 47/ Ident-SNI  | distinct        |
| 211 | LMNA    | ENST0000036830(E9  | -41 [chr1: C       | C -> T (homo) | 100% (1131) [100% (705) / 99% (426)]  | rs553016 (1000                     | c.1489-41C>T               | 2/5 POLY           | distinct        |
| 212 | SMARCA2 | ENST0000034972(E33 | -20 [chr9: C       | T -> C (homo) | 100% (123) [100% (82) / 100% (41)]    | rs3818384 (100                     | c.4595-20T>C               | 0/2 POLY           | distinct        |
| 213 | CHD6    | ENST0000037323(E14 | -19 [chr2(C        | G -> A (homo) | 100% (974) [100% (600) / 100% (374)]  | rs4812516 (100                     | c.1858-19G>A               | 0/1 POLY           | distinct        |
| 214 | PIK3CA  | ENST0000026396(E6  | -17 [chr3: C       | C -> A (homo) | 100% (785) [100% (497) / 100% (288)]  | rs2699896 (100                     | c.1060-17C>A               | 67/ POLY           | distinct        |
| 215 | MEN1    | ENST0000031204(E2  | -16 [chr1: C       | C -> G (het)  | 56% (98) [56% (96) / 50% (2)]         | rs509606 (1000                     | c.-23-16C>G                | 1/5 POLY           | forced,distinct |
| 216 | BRAF    | ENST0000028860(E18 | -16 [chr7: C       | C -> T (het)  | 82% (14) [100% (10) / 57% (4)]        | rs368721021 (C                     | c.2128-16C>T               | 1/1 POLY           | distinct        |
| 217 | BRCA2   | ENST0000054445(E17 | -14 [chr1: C       | T -> C (homo) | 100% (469) [100% (365) / 100% (104)]  | rs9534262 (100                     | c.7806-14T>C               | 85/ POLY           | distinct        |
| 218 | PIK3CA  | ENST0000026396(E12 | -13 [chr3: C       | T -> C (het)  | 52% (267) [57% (200) / 41% (67)]      | rs41273619 (10                     | c.1747-13T>C               | 0/1 POLY           | distinct        |
| 219 | ATM     | ENST0000027861(E24 | -12 / 1bp I (Dup)  | A (het)       | 85% (130) [80% (89) / 98% (41)]       | ClinVar ben (M                     | c.3403-13dupA              | 38/ POLY           | distinct        |
| 220 | JAG1    | ENST0000025495(E6  | 10 (765) [C        | C -> T (het)  | 35% (310) [35% (144) / 35% (166)]     | > Y (255) COSM3758428              | c.765C>T                   | p.T 5/7 POLY       | distinct        |
| 221 | KMT2D   | ENST0000030106(E11 | 29 (2826) C        | C -> T (homo) | 100% (833) [100% (421) / 100% (412)]  | > I (942) COSM3753294              | c.2826C>T                  | p.II 3/1 POLY      | distinct        |
| 222 | ATM     | ENST0000027861(E40 | 30 (5948) C        | A -> G (homo) | 100% (97) [100% (44) / 100% (53)]     | S (198) rs659243 (1000             | c.5948A>G                  | p.A 272 POLY       | distinct        |

|     |         |                     |                    |               |                                         |                          |                   |                 |                 |
|-----|---------|---------------------|--------------------|---------------|-----------------------------------------|--------------------------|-------------------|-----------------|-----------------|
| 223 | SMARCA2 | ENST0000034972: E2  | 32 [chr9:gC        | G -> A (het)  | 58% (199) [59% (127) / 58% (72)]        | ' UTR rs10964468 (10     | c.-5G>A           | 0/3 POLY        | distinct        |
| 224 | KRAS    | ENST0000025607: E5  | 33 (483) [C        | G -> A (homo) | 100% (947) [100% (422) / 100% (525)]    | · R (161 rs4362222 (100  | c.483G>A          | p.A 79/ POLY    | distinct        |
| 225 | APC     | ENST0000025743: E12 | 50 (1458) C        | T -> C (homo) | 100% (723) [100% (337) / 100% (386)]    | · Y (486 COSM1432175     | c.1458T>C         | p.T 3/2 POLY    | distinct        |
| 226 | LMNA    | ENST0000036830: E5  | 51 (861) [C        | T -> C (het)  | 32% (339) [30% (143) / 34% (196)]       | · A (287 rs538089 (1000  | c.861T>C          | p.A 2/8 POLY    | distinct        |
| 227 | FGFR2   | ENST0000035848: E6  | 72 (696) [C        | A -> G (homo) | 100% (1149) [100% (490) / 100% (659)]   | · V (232 rs1047100 (100  | c.696A>G          | p.V 0/1 POLY    | distinct        |
| 228 | FGFR2   | ENST0000047885: E4  | 94 [chr10 C        | A -> G (homo) | 100% (668) [100% (466) / 100% (202)]    | ' UTR rs2981437 (100     | c.-109A>G         | 1/0 POLY        | distinct        |
| 229 | KMT2D   | ENST0000030106: E39 | 96 (10836) C       | G -> A (homo) | 100% (827) [100% (365) / 100% (462)]    | Q (361: COSM431202 (C    | c.10836G>A        | p.C 3/1 POLY    | distinct        |
| 230 | SMAD3   | ENST0000032736: E2  | 103 (309) C        | A -> G (homo) | 100% (1004) [100% (623) / 100% (381)]   | · L (103) rs1065080 (100 | c.309A>G          | p.L 12/ POLY    | distinct        |
| 231 | LMNA    | ENST0000036830: E12 | 106 [chr1 C        | G -> C (homo) | 100% (503) [100% (191) / 100% (312)]    | ' UTR rs7339 (1000Ge     | c.*79G>C          | 2/7 POLY        | distinct        |
| 232 | MEN1    | ENST0000031204: E9  | 114 (1299) C       | T -> C (homo) | 100% (1269) [100% (670) / 100% (599)]   | · H (433 rs540012 (1000  | c.1299T>C         | p.T 20/ POLY    | distinct        |
| 233 | TP53    | ENST0000026930: E4  | 119 (215) C        | C -> G (homo) | 100% (735) [100% (313) / 100% (422)]    | > R (72) COSM3766192     | c.215C>G          | p.F 149 POLY    | distinct        |
| 234 | ARID1B  | ENST0000034608: E6  | 135 (2172) C       | G -> A (homo) | 100% (969) [100% (377) / 100% (592)]    | · A (724 COSM1487405     | c.2172G>A         | p.A 4/1 POLY    | distinct        |
| 235 | BCORL1  | ENST0000054005: E3  | 154 (331) C        | T -> C (homo) | 100% (698) [100% (404) / 100% (294)]    | · L (111) rs4830173 (100 | c.331T>C          | p.F 1/0 POLY    | distinct        |
| 236 | KMT2D   | ENST0000030106: E10 | 168 (1426) C       | G -> A (homo) | 98% (511) [94% (127) / 100% (384)]      | · T (476 rs1064210 (100  | c.1426G>A         | p.A 0/3 POLY    | distinct        |
| 237 | KMT2D   | ENST0000030106: E10 | 168 (1426) C       | G -> A (homo) | 98% (511) [94% (127) / 100% (384)]      | · T (476 rs1064210 (100  | c.1426G>A         | p.A 0/3 POLY    | distinct        |
| 238 | LMNA    | ENST0000036830: E7  | 181 (1338) C       | T -> C (homo) | 100% (216) [100% (80) / 100% (136)]     | · D (446 rs505058 (1000  | c.1338T>C         | p.A 2/8 POLY    | distinct        |
| 239 | LMNA    | ENST0000036830: E7  | 181 (1338) C       | T -> C (homo) | 100% (216) [100% (80) / 100% (136)]     | · D (446 rs505058 (1000  | c.1338T>C         | p.A 2/8 POLY    | distinct        |
| 240 | SMARCA2 | ENST0000034972: E25 | 216 (3672) C       | G -> A (homo) | 100% (537) [100% (269) / 100% (268)]    | E (1224 COSM3763856      | c.3672G>A         | p.C 0/4 POLY    | distinct        |
| 241 | JAG1    | ENST0000025495: E26 | 218 (3417) C       | T -> C (homo) | 100% (866) [100% (403) / 100% (463)]    | Y (1135 COSM3758426      | c.3417T>C         | p.T 5/7 POLY    | distinct        |
| 242 | CHD1    | ENST0000028404: E35 | 263..265 (!:D      | CCT (homo)    | 97% (1467) [97% (808) / 96% (659)]      | · (1684 COSM327350 (C    | c.5050_5052delCCT | p.P 0/1 POLY    | distinct        |
| 243 | MEN1    | ENST0000031204: E10 | 271 (1621) C       | A -> G (homo) | 100% (1341) [100% (779) / 100% (562)]   | · A (541 COSM255213 (C   | c.1621A>G         | p.T 20/ POLY    | distinct        |
| 244 | SMAD3   | ENST0000032736: E1  | 296 [chr1 C        | G -> A (het)  | 26% (66) [21% (38) / 36% (28)]          | ' UTR rs1061427 (100     | c.-15G>A          | 0/8 POLY        | distinct        |
| 245 | RNF43   | ENST0000040797: E9  | 300 (1252) C       | C -> A (homo) | 100% (2000) [100% (1063) / 100% (937)]  | M (418 COSM4130449       | c.1252C>A         | p.L 13/ POLY    | distinct        |
| 246 | NF2     | ENST0000033864: E1  | 332 [chr2 C        | G -> C (homo) | 95% (158) [95% (154) / 100% (4)]        | ' UTR rs1800540 (100     | c.-110G>C         | 12/ POLY        | forced,distinct |
| 247 | CASR    | ENST0000049013: E7  | 512 (2244) C       | G -> C (homo) | 100% (2197) [100% (1122) / 100% (1075)] | · P (748 rs2036400 (100  | c.2244G>C         | p.F 3/1 POLY    | distinct        |
| 248 | KMT2C   | ENST0000026218: E14 | 635 (2448) I (Dup) | A (het)       | 27% (195) [29% (68) / 27% (127)]        | 816 ( R rs150073007 (d   | c.2447dupA        | p.T 0/1 POLY    | distinct        |
| 249 | KMT2D   | ENST0000030106: E31 | 1245 (747: C       | G -> T (homo) | 100% (1035) [100% (679) / 99% (356)]    | G (249: COSM3722550      | c.7479G>T         | p.C 3/1 POLY    | distinct        |
| 250 | KMT2D   | ENST0000030106: E31 | 1245 (747: C       | G -> T (homo) | 100% (1035) [100% (679) / 99% (356)]    | G (249: COSM3722550      | c.7479G>T         | p.C 3/1 POLY    | distinct        |
| 251 | CASR    | ENST0000049013: E7  | 1299 (303: C       | G -> C (homo) | 100% (1268) [100% (577) / 100% (691)]   | Q (1011 rs1801726 (100   | c.3031G>C         | p.C 3/1 POLY    | distinct        |
| 252 | CASR    | ENST0000049013: E7  | 1565 [chr C        | A -> T (homo) | 100% (623) [100% (159) / 100% (464)]    | ' UTR rs4677948 (100     | c.*60A>T          | 3/1 POLY        | distinct        |
| 253 | BRCA2   | ENST0000054445: E11 | 2654 (456: C       | A -> G (homo) | 100% (544) [100% (280) / 100% (264)]    | L (1521 rs206075 (1000   | c.4563A>G         | p.L 657 POLY    | distinct        |
| 254 | SETD2   | ENST0000040979: E3  | 3378 (346: C       | T -> C (homo) | 100% (1061) [100% (579) / 100% (482)]   | N (1151 rs6767907 (100   | c.3465T>C         | p.A 1/6 POLY    | distinct        |
| 255 | APC     | ENST0000025743: E16 | 3507 (546: C       | T -> A (homo) | 100% (345) [100% (152) / 100% (193)]    | D (182: COSM3760871      | c.5465T>A         | p.V 4/1 POLY    | distinct        |
| 256 | BRCA2   | ENST0000054445: E11 | 4604 (651: C       | G -> C (homo) | 100% (335) [100% (214) / 100% (121)]    | V (2171 COSM4147689      | c.6513G>C         | p.V 301 POLY    | distinct        |
| 257 | CASR    | ENST0000049013: E7  | +15 / 1bp I (Dup)  | A (het)       | 29% (22) [0% (0) / 29% (22)]            | rs33974189 (M            | c.*188dupA        | 0/2 POLY        | forced,distinct |
| 258 | LMNA    | ENST0000036830: E6  | +16 [chr1 C        | G -> A (het)  | 37% (422) [35% (184) / 38% (238)]       | rs534807 (1000           | c.1157+16G>A      | 2/8 POLY        | distinct        |
| 259 | LMNA    | ENST0000036830: E6  | +16 [chr1 C        | G -> A (het)  | 37% (422) [35% (184) / 38% (238)]       | rs534807 (1000           | c.1157+16G>A      | 2/8 POLY        | distinct        |
| 260 | CASR    | ENST0000049013: E3  | +19 [chr3 C        | G -> A (homo) | 99% (373) [100% (10) / 99% (363)]       | rs9869985 (100           | c.492+19G>A       | 3/1 POLY        | forced,distinct |
| 261 | TP53    | ENST0000026930: E2  | +38 [chr1 C        | C -> G (het)  | 93% (240) [61% (30) / 100% (210)]       | rs1642785 (100           | c.74+38C>G        | 117 POLY        | distinct        |
| 262 | BRCA1   | ENST0000035765: E1  | +101 [chr C        | C -> G (homo) | 99% (307) [100% (230) / 99% (77)]       | rs799905 (1000           | c.-20+101C>G      | 1/0 POLY        | distinct        |
| 263 | KDM6A   | ENST0000037796: E18 | -5 / 1bp [rD       | T (het)       | 45% (35) [42% (16) / 48% (19)]          | ExAC, ClinVar (f         | c.2703-5delT      | 0/1 POLY (sel   | distinct        |
| 264 | RNF43   | ENST0000040797: E2  | 524 (139) C        | A -> G (het)  | 22% (396) [22% (188) / 21% (208)]       | > V (47) rs3744093 (100  | c.139A>G          | p.II 14/ Poly   | distinct        |
| 265 | SMARCA2 | ENST0000034972: E4  | 350..352 (!:D      | GCA (het)     | 36% (102) [36% (46) / 36% (56)]         | l (235..236)             | c.705_707delGCA   | p.C 0/4 Sequenz | distinct        |
| 266 | BRCA2   | ENST0000054445: E14 | 390 (7397) C       | T -> C (homo) | 100% (282) [100% (91) / 100% (191)]     | A (246f rs169547 (1000   | c.7397T>C         | p.V 302 Wildtyp | distinct        |
