# Supplementary material for: The Gain-of-Function p53 R248W Mutant Promotes Migration by STAT3 Deregulation in Human Pancreatic Cancer Cells
Source: PubMed Central journal article supplement (PMC8226097; doi:10.3389/fonc.2021.642603), 2021-06-11
Supplement: Table_1.pdf [file Table_1.pdf]

Supplementary Table 1: Reagents and Resources

| REAGENT or RESOURCE                                 | SOURCE                            | IDENTIFIER                    |          |       |
|-----------------------------------------------------|-----------------------------------|-------------------------------|----------|-------|
|                                                     |                                   |                               | WB       | Co-IP |
| <b>Antibodies</b>                                   |                                   |                               |          |       |
| Rabbit monoclonal anti-Akt [D9E]                    | Cell Signaling                    | 9272,<br>RRID:AB_329827       | 1:1,000  |       |
| Mouse polyclonal anti-beta-Actin                    | Abcam                             | ab6276,<br>RRID:AB_2223210    | 1:10,000 |       |
| Rabbit polyclonal anti-beta-Actin                   | Abcam                             | ab8227,<br>RRID:AB_2305186    | 1:10,000 |       |
| Mouse monoclonal anti-HSC70 [B-6]                   | Santa Cruz                        | sc-7298,<br>RRID:AB_627761    | 1:5,000  |       |
| Mouse monoclonal anti-MDM2 (Ab-1) [IF-2]            | Calbiochem®/Millipore             | OP46,<br>RRID:AB_2335867      | 1:300    |       |
| Rabbit monoclonal anti-p21 Waf1/Cip1 [12D1]         | Cell Signaling                    | 2947,<br>RRID:AB_823586       | 1:1,000  |       |
| Mouse monoclonal anti-p53 [DO-1]                    | Santa Cruz                        | sc-126,<br>RRID:AB_628082     | 1:10,000 |       |
| Mouse monoclonal anti-p53 [DO-1], HRP conjugated    | Santa Cruz                        | sc-126 HRP,<br>RRID:AB_628082 | 1:1,000  | 3µg   |
| Rabbit monoclonal anti-phospho-Y705 STAT3 [EP2147Y] | Abcam                             | ab76315,<br>RRID:AB_1658549   | 1:2,000  | 3µg   |
| Rabbit polyclonal anti-STAT3                        | Santa Cruz                        | sc-482,<br>RRID:AB_632440     | 1:1,000  |       |
| Rabbit monoclonal anti-STAT3 [79D7]                 | Cell Signaling                    | 4904,<br>RRID:AB_331269       | 1:1,000  | 3µg   |
| Rabbit monoclonal anti-IgG [EPR25A]                 | Abcam                             | ab172730,<br>RRID:AB_2687931  |          | 3µg   |
| goat anti-rabbit IgG-HRP                            | Santa Cruz                        | sc-2004,<br>RRID:AB_631746    | 1:10,000 |       |
| goat anti-mouse IgG-HRP                             | Santa Cruz                        | sc-2005,<br>RRID:AB_631736    | 1:10,000 |       |
| <b>Chemicals, Peptides and Recombinant Proteins</b> |                                   |                               |          |       |
| BCA protein assay                                   | Pierce                            | 23227                         |          |       |
| CellTiter-Glo® Luminescent Cell Viability Assay     | Promega                           | G7571                         |          |       |
| Clarity Max™ Western ECL Substrate                  | BioRad                            | 1705062                       |          |       |
| cOmplete™ mini protease inhibitor cocktail          | Roche                             | 11836170001                   |          |       |
| Crystal violet (C.I. 42555)                         | Roth                              | T123.1                        |          |       |
| Cycloheximide                                       | Sigma-Aldrich                     | C7698                         |          |       |
| Dimethyl sulfoxide (DMSO) Cell culture grade        | AppliChem                         | A3672                         |          |       |
| EDTA                                                | Roth                              | 8040.1                        |          |       |
| Ethanol absolut                                     | Chemsolute®/T h.Geyer             | 2246                          |          |       |
| Ganetespib                                          | Provided by Synta Pharmaceuticals | N/A                           |          |       |
| Imidazol                                            | Roth                              | 899.2                         |          |       |
| Immobilion Western chemiluminescent HRP substrate   | Millipore/Merck                   | WBKLS0500                     |          |       |
| InSolution™ MG-132                                  | Calbiochem®/M                     | 474791                        |          |       |

|                                                                                  |                         |                                |         |                  |            |                     |
|----------------------------------------------------------------------------------|-------------------------|--------------------------------|---------|------------------|------------|---------------------|
|                                                                                  | erck                    |                                |         |                  |            |                     |
| Interleukin-6                                                                    | Immunotools             | 11340064                       |         |                  |            |                     |
| Methanol                                                                         | Roth                    | 8388.3                         |         |                  |            |                     |
| Milk powder                                                                      | Roth                    | T145.4                         |         |                  |            |                     |
| NaCl                                                                             | Roth                    | 3957.2                         |         |                  |            |                     |
| NaF                                                                              | AppliChem               | A0401                          |         |                  |            |                     |
| Nitrocellulose membranes                                                         | Amersham                | GE10600001                     |         |                  |            |                     |
| Nonidet™ P 40 Substitute                                                         | Sigma-Aldrich           | 74385                          |         |                  |            |                     |
| Nutlin-3a                                                                        | BOC Sciences            | B0084-425358                   |         |                  |            |                     |
| Onalespib                                                                        | Selleckchem             | S1163                          |         |                  |            |                     |
| Oncostatin M (209a.a)                                                            | Immunotools             | 11344223                       |         |                  |            |                     |
| Protein G Sepharose 4 Fast Flow                                                  | GE Healthcare           | 17061805                       |         |                  |            |                     |
| SDS                                                                              | Roth                    | CN30.3                         |         |                  |            |                     |
| Sodium deoxycholate                                                              | Sigma-Aldrich           | 30970                          |         |                  |            |                     |
| Sodium orthovanadate                                                             | Sigma-Aldrich           | S6508                          |         |                  |            |                     |
| Static                                                                           | Santa Cruz              | sc-202818                      |         |                  |            |                     |
| SuperSignal™ West Femto Maximum Sensitivity Substrate                            | ThermoFisher Scientific | 34095                          |         |                  |            |                     |
| Tris-HCl                                                                         | Roth                    | 4855.3                         |         |                  |            |                     |
| TritonX-100                                                                      | AppliChem               | A1388                          |         |                  |            |                     |
| Tween-20                                                                         | AppliChem               | A4974                          |         |                  |            |                     |
| <b>Reagents for Cell culture</b>                                                 |                         |                                |         |                  |            |                     |
| DMEM                                                                             | Gibco                   | 31600091                       |         |                  |            |                     |
| FBS                                                                              | Merck                   | S0615                          |         |                  |            |                     |
| L-Glutamine                                                                      | Gibco                   | 25030123                       |         |                  |            |                     |
| Mycoplasma Detection Kit                                                         | Lonza                   | LT07-318                       |         |                  |            |                     |
| Penicillin-Streptomycin                                                          | Gibco                   | 15140122                       |         |                  |            |                     |
| RPMI 1640                                                                        | Gibco                   | 42401042                       |         |                  |            |                     |
| Lipofectamine™ 3000 Transfection Reagent                                         | Invitrogen              | L3000015                       |         |                  |            |                     |
| Lipofectamine™ 2000 Transfection Reagent                                         | Invitrogen              | 11668019                       |         |                  |            |                     |
| TC treated 6 well plates                                                         | Sarstedt                | 83.3920                        |         |                  |            |                     |
| TC treated 96 well plates                                                        | Corning                 | 3903                           |         |                  |            |                     |
| Falcon® Permeable Support for 24-well Plate with 8.0 µm Transparent PET Membrane | Corning                 | 353097                         |         |                  |            |                     |
| Falcon® 24-well TC-treated Cell Polystyrene Permeable Support Companion Plate    | Corning                 | 353504                         |         |                  |            |                     |
| <b>Experimental models: Cell lines</b>                                           |                         |                                |         |                  |            |                     |
|                                                                                  |                         |                                | 96 well | Transwell insert | 6 well cmp | 6 well transfection |
| L3.6pl                                                                           | RRID:CV CL_0384         | PMID: 23917223; PMID: 10935470 | 5,000   | -                | 150,000    | -                   |
| MIA-PACA-2                                                                       | DSMZ, RRID:CV CL_0428   | ACC 733                        | 3,000   | 70,000           | 120,000    | 80,000              |
| PANC-1                                                                           | ATCC, RRID:CV CL_0480   | CRL-1469                       | 5,000   | 50,000           | 200,000    | 100,000             |

|                                                           |                             |                                                                                                                                                                                                                                       |        |         |         |         |
|-----------------------------------------------------------|-----------------------------|---------------------------------------------------------------------------------------------------------------------------------------------------------------------------------------------------------------------------------------|--------|---------|---------|---------|
| PA-TU-8988T                                               | DSMZ,<br>RRID:CV<br>CL_1847 | ACC 162                                                                                                                                                                                                                               | 4,000  | 70,000  | 150,000 | 90,000  |
| PA-TU-8902                                                | DSMZ,<br>RRID:CV<br>CL_1845 | ACC 179                                                                                                                                                                                                                               | 4,000  | 70,000  | 150,000 | 100,000 |
| BXPC-3                                                    | ATCC,<br>RRID:CV<br>CL_0186 | CRL-1687                                                                                                                                                                                                                              | 5,000  | 100,000 | 200,000 | 100,000 |
| CAPAN-1                                                   | ATCC,<br>RRID:CV<br>CL_0237 | HTB-79                                                                                                                                                                                                                                | 10,000 | -       | 300,000 | -       |
| cmp, compound                                             |                             |                                                                                                                                                                                                                                       |        |         |         |         |
| <b>Oligonucleotides and Recombinant DNA</b>               |                             |                                                                                                                                                                                                                                       |        |         |         |         |
| siRNA Silencer™ Select Negative Control No. 2 siRNA (scr) | Invitrogen                  | 4390847                                                                                                                                                                                                                               |        |         |         |         |
| siRNA p53 Silencer™ Select No.1                           | ThermoFisher Scientific     | 4390824, siRNA ID s605                                                                                                                                                                                                                |        |         |         |         |
| siRNA p53 Silencer™ Select No.2                           | ThermoFisher Scientific     | 4390824, siRNA ID s606                                                                                                                                                                                                                |        |         |         |         |
| siRNA p53 Silencer™ Select No.3                           | ThermoFisher Scientific     | AM51331, siRNA ID 106141                                                                                                                                                                                                              |        |         |         |         |
| siRNA STAT3 Silencer™ Select No.1                         | ThermoFisher Scientific     | 4390824, siRNA ID s743                                                                                                                                                                                                                |        |         |         |         |
| siRNA STAT3 Silencer™ Select No.2                         | ThermoFisher Scientific     | 4390824, siRNA ID s744                                                                                                                                                                                                                |        |         |         |         |
| <b>Software and Algorithms</b>                            |                             |                                                                                                                                                                                                                                       |        |         |         |         |
| ImageJ software                                           | Open source                 | <a href="https://imagej.net/Welcome">https://imagej.net/Welcome</a>                                                                                                                                                                   |        |         |         |         |
| Image Lab™ Software                                       | Biorad                      | <a href="http://www.bio-rad.com/de-de/product/image-lab-software">http://www.bio-rad.com/de-de/product/image-lab-software</a>                                                                                                         |        |         |         |         |
| ZEN                                                       | Zeiss                       | <a href="https://www.zeiss.de/mikroskopie/produkte/mikroskopsoftware/zen.html">https://www.zeiss.de/mikroskopie/produkte/mikroskopsoftware/zen.html</a>                                                                               |        |         |         |         |
| Image Lab™ Software                                       | Biorad                      | <a href="http://www.bio-rad.com/de-de/product/image-lab-software">http://www.bio-rad.com/de-de/product/image-lab-software</a>                                                                                                         |        |         |         |         |
| Adobe Photoshop Software                                  | Adobe                       | <a href="https://www.adobe.com/de/creativecloud/plans.html">https://www.adobe.com/de/creativecloud/plans.html</a>                                                                                                                     |        |         |         |         |
| Celigo Imaging Cytometer                                  | Nexcelom Bioscience         | <a href="https://www.nexcelom.com/nexcelom-products/cellometer-and-celigo-image-cytometers/celigo-imaging-cytometer/">https://www.nexcelom.com/nexcelom-products/cellometer-and-celigo-image-cytometers/celigo-imaging-cytometer/</a> |        |         |         |         |
